# Supplementary material
Source: PubMed Central journal article supplement (PMC10686051)

Extended Data Fig. 1C

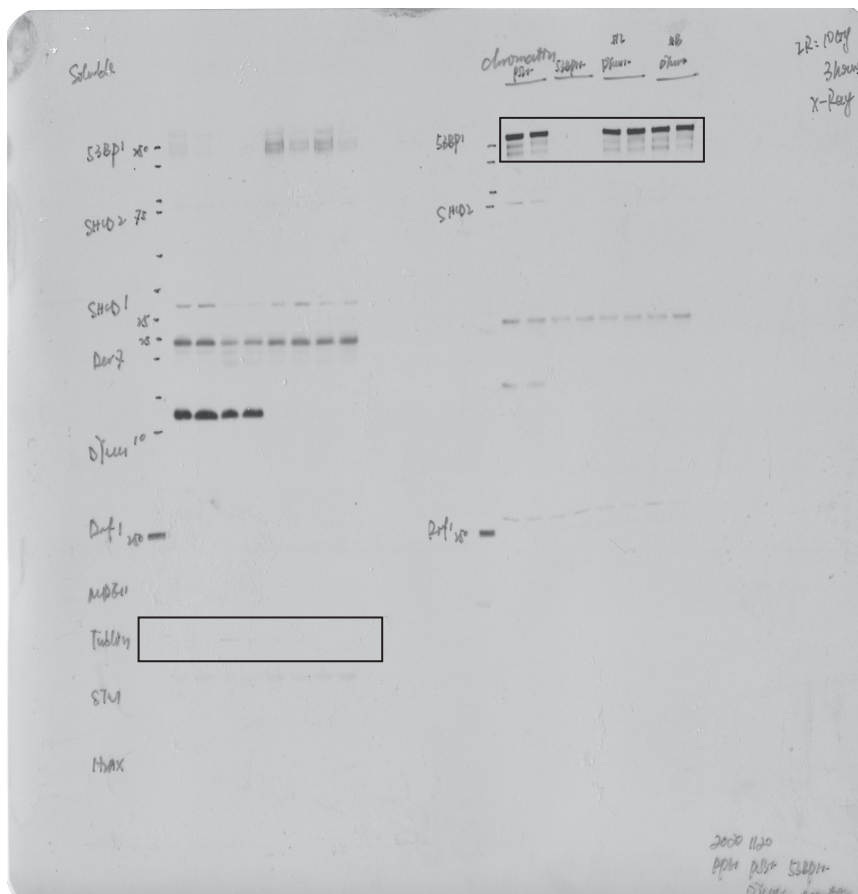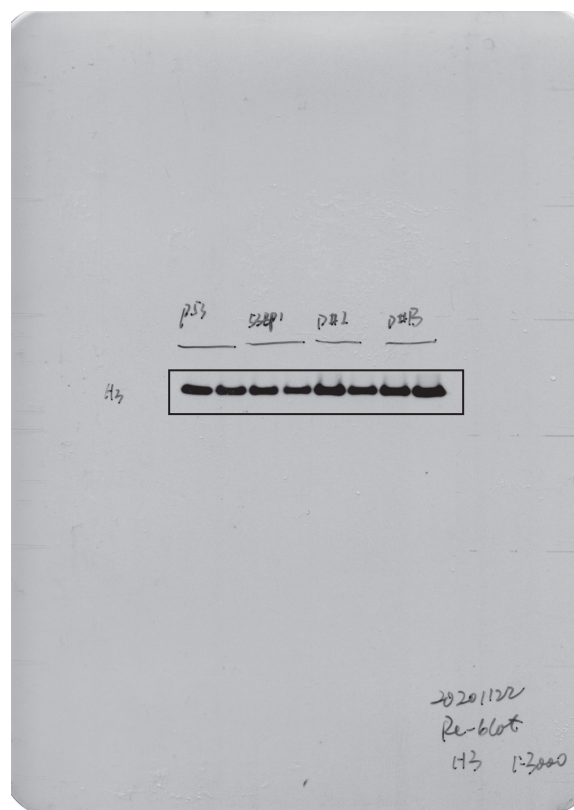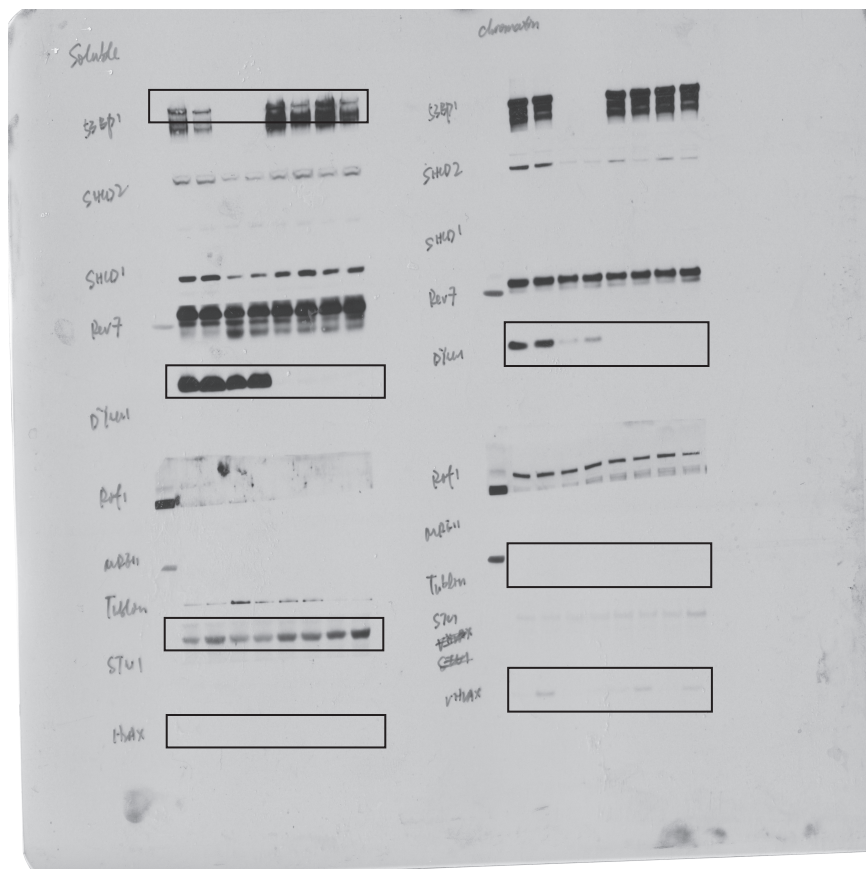

Supplement: NIHMS1932692-supplement-ED_Figure_1_Unedited_Blots.pdf [file NIHMS1932692-supplement-ED_Figure_1_Unedited_Blots.pdf]

Extended Data Fig 4B

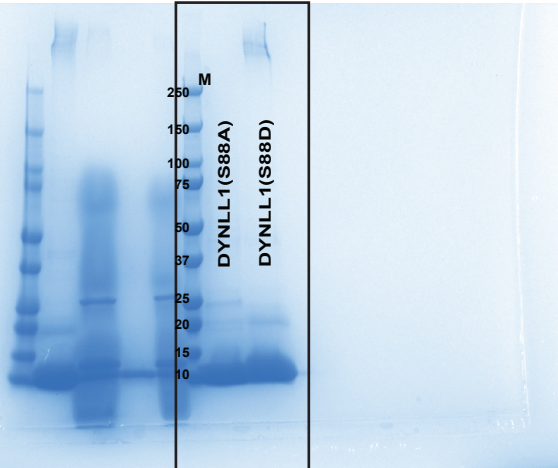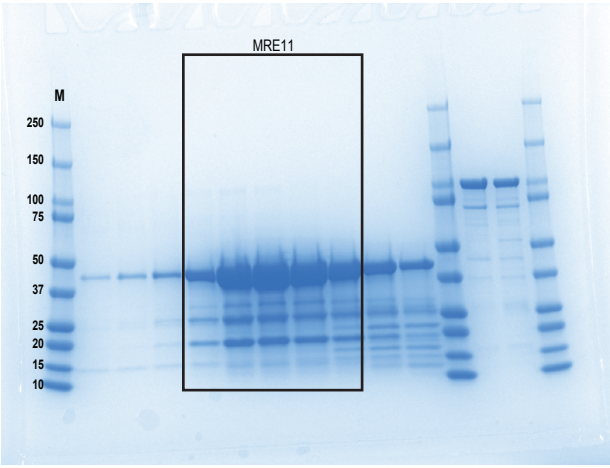

Supplement: NIHMS1932692-supplement-ED_Figure_4_Unedited_Blots.pdf [file NIHMS1932692-supplement-ED_Figure_4_Unedited_Blots.pdf]

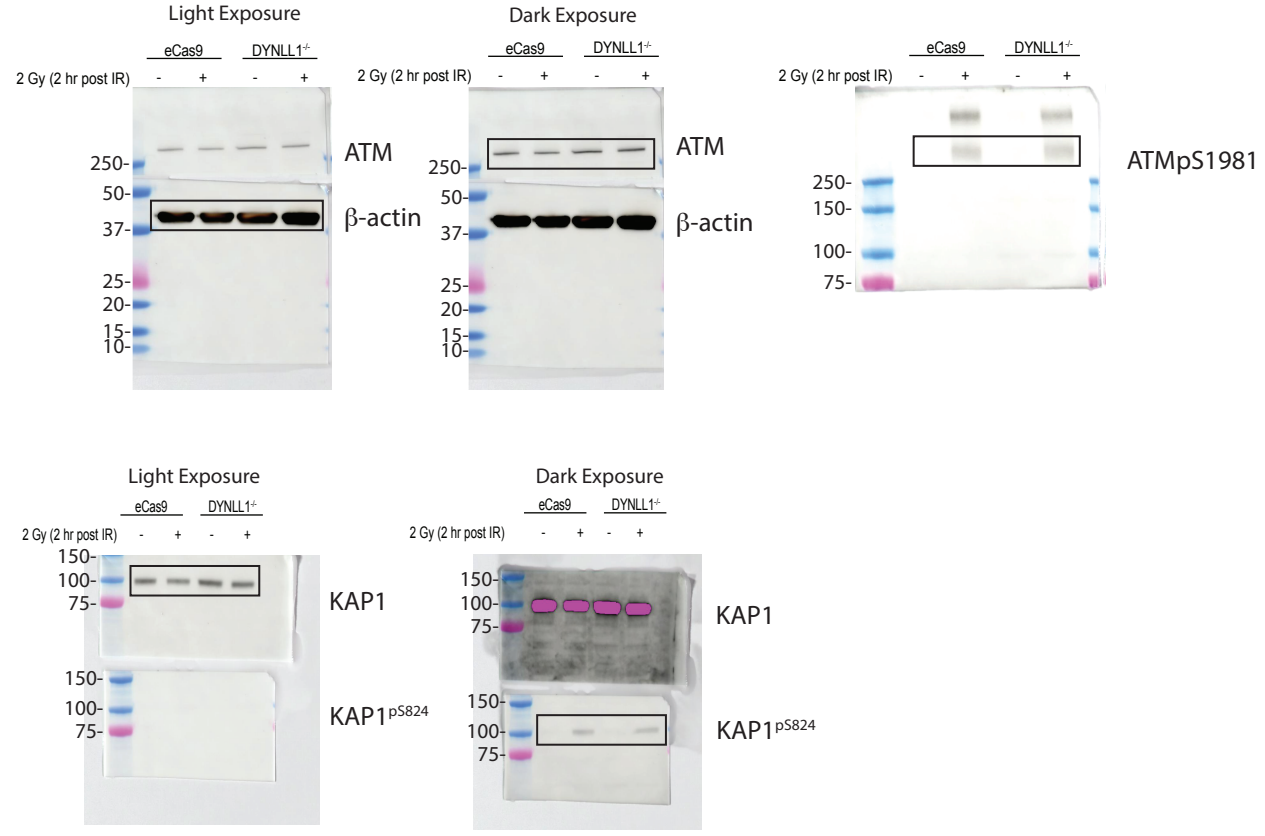

Supplement: NIHMS1932692-supplement-ED_Figure_6_Unedited_Blots.pdf [file NIHMS1932692-supplement-ED_Figure_6_Unedited_Blots.pdf]

Extended Data Fig 7E

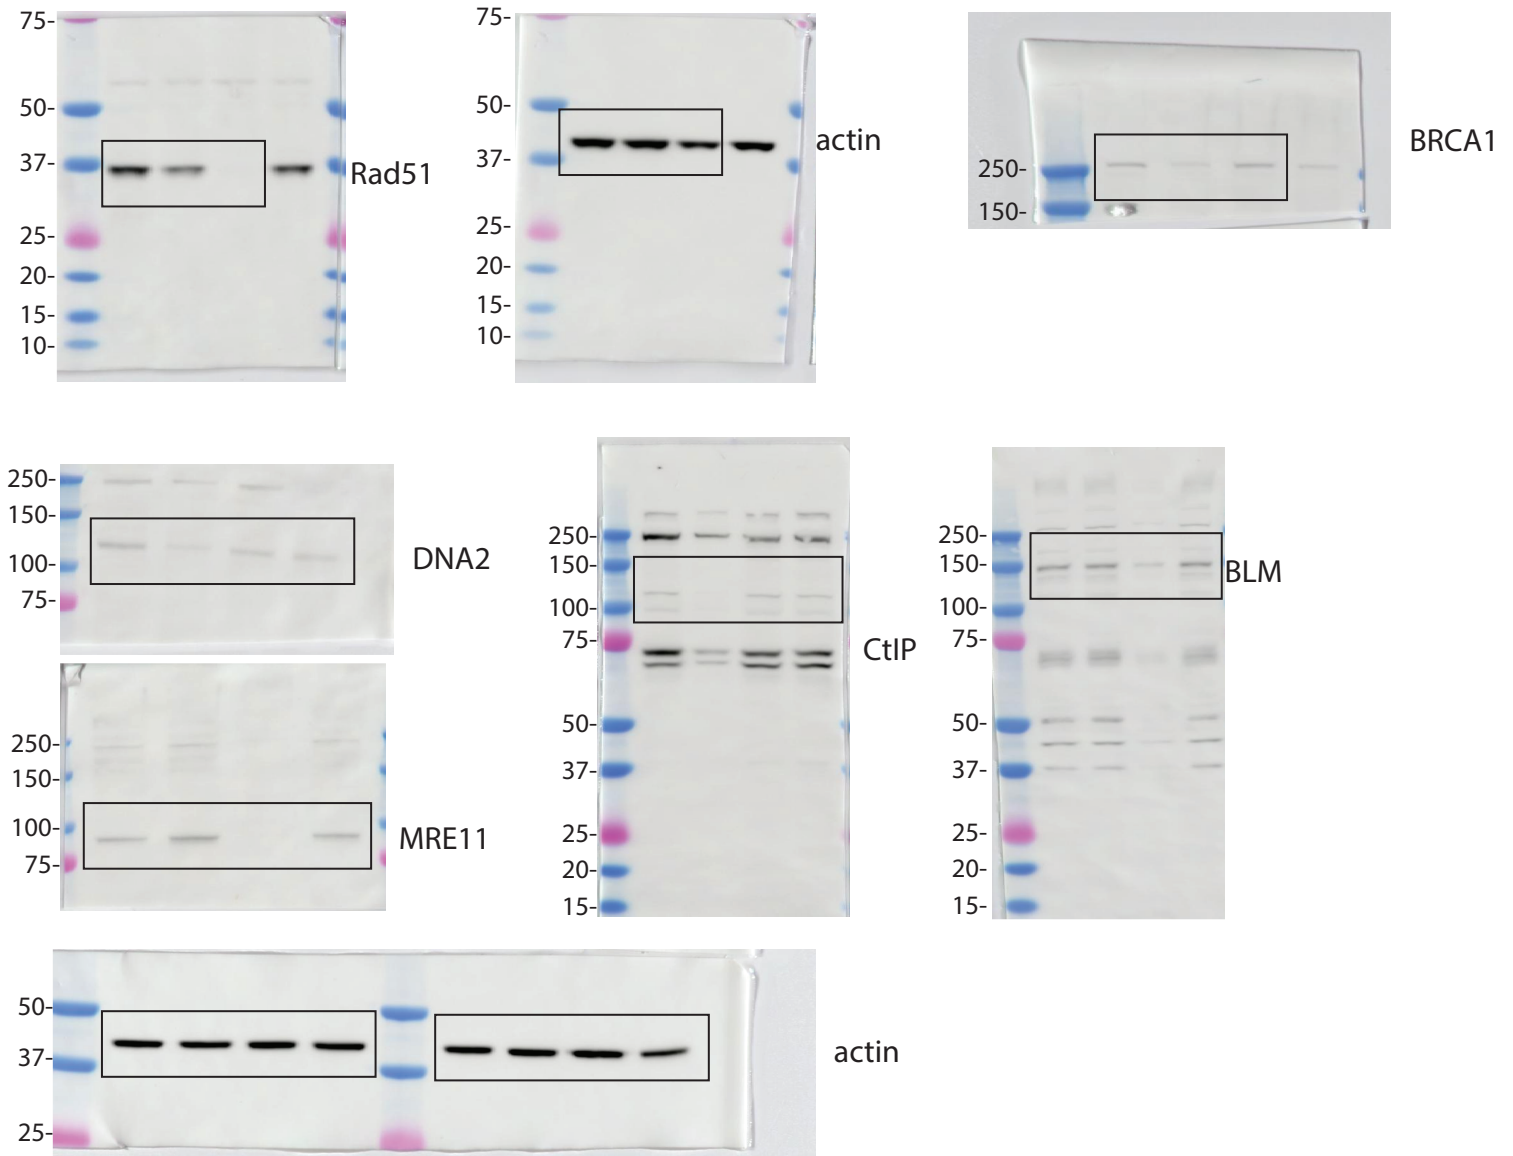

Supplement: NIHMS1932692-supplement-ED_Figure_7_Unedited_Blots.pdf [file NIHMS1932692-supplement-ED_Figure_7_Unedited_Blots.pdf]

Fig. 2C

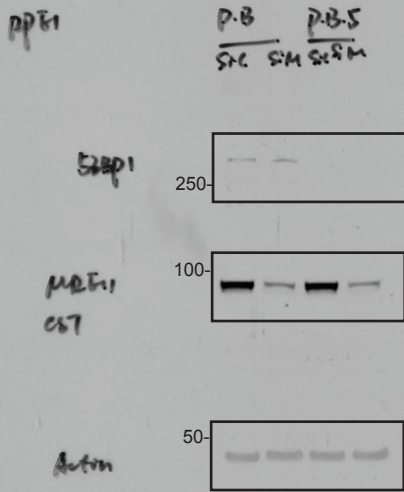

2021.9.13  
S: MBE1  
B: PM 60

Supplement: NIHMS1932692-supplement-Figure_2_Unedited_Blots.pdf [file NIHMS1932692-supplement-Figure_2_Unedited_Blots.pdf]

Fig. 4A

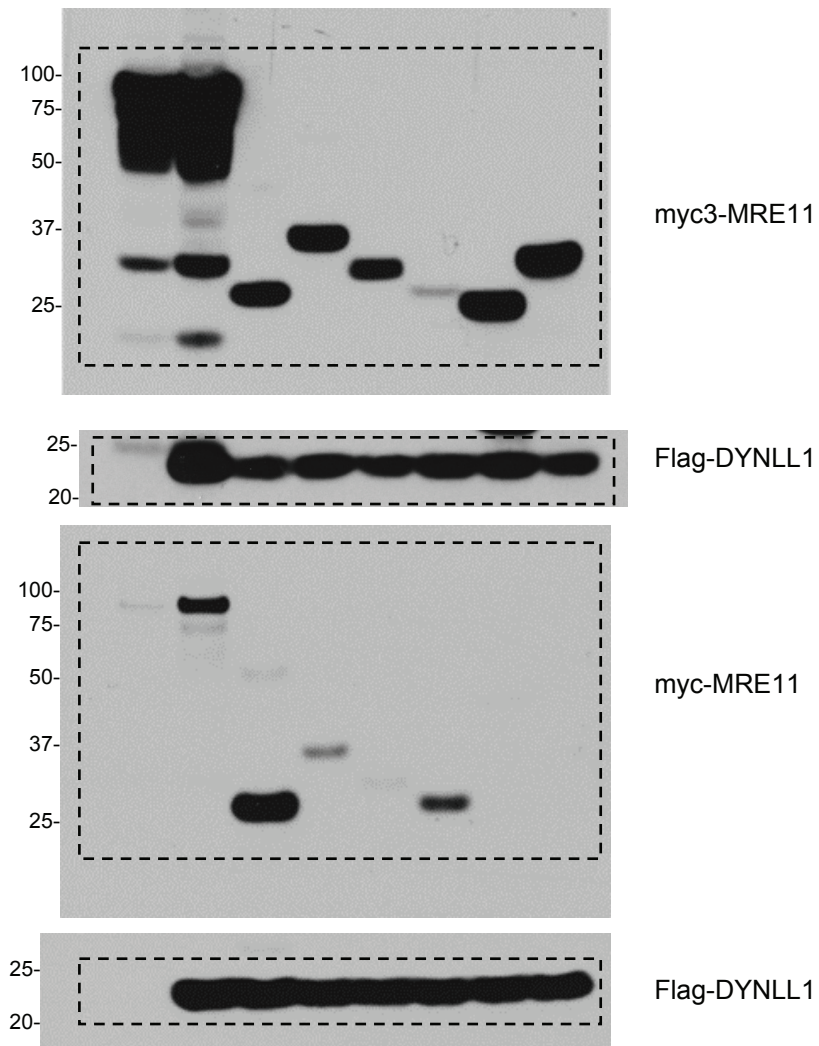

Fig. 4C

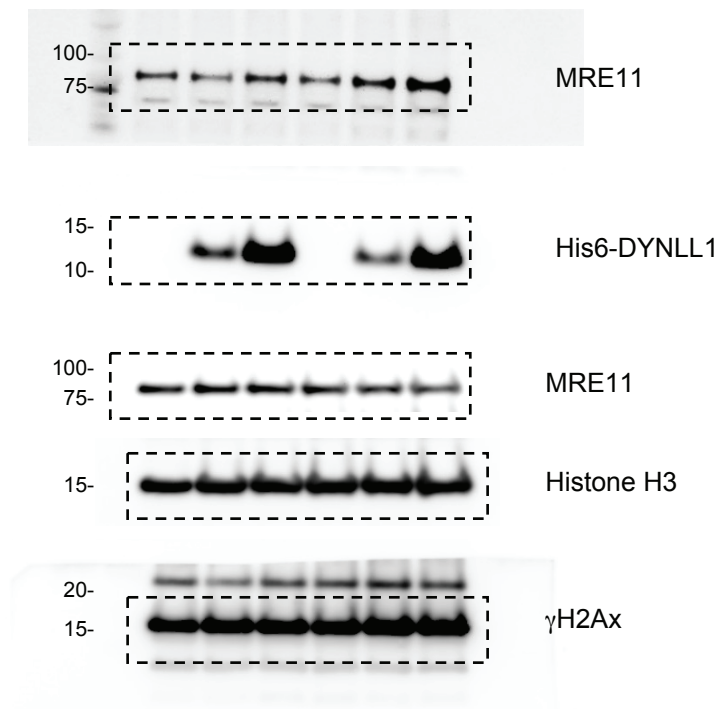

Supplement: NIHMS1932692-supplement-Figure_4_Unedited_Blots.pdf [file NIHMS1932692-supplement-Figure_4_Unedited_Blots.pdf]
